# Supplementary material for: Evidence that molecular changes in cells occur before morphological alterations during the progression of breast ductal carcinoma
Source: PubMed Central journal article supplement (PMC2614523; doi:10.1186/bcr2157), 2008-10-17
Supplement: bcr2157-S2.pdf [file bcr2157-S2.pdf]

**Additional Data File 2 - 90 genes****Comparison among pure DCIS, *in situ* component of DCIS-IDC and IDC**

| <b>GeneID</b> | <b>Symbol</b> | <b>Description</b>                                                                                                |
|---------------|---------------|-------------------------------------------------------------------------------------------------------------------|
| 51061         | TXNDC11       | thioredoxin domain containing 11                                                                                  |
| 29965         | C16orf5       | chromosome 16 open reading frame 5                                                                                |
| 51093         | C1orf66       | chromosome 1 open reading frame 66                                                                                |
| 23154         | NCDN          | neurochondrin                                                                                                     |
| 1140          | CHRNB1        | cholinergic receptor, beta 1 (muscle), protein-coding                                                             |
| 9486          | CHST10        | carbohydrate sulfotransferase 10                                                                                  |
| 4140          | MARK3         | MAP/microtubule affinity-regulating kinase 3                                                                      |
| 114881        | OSBPL7        | oxysterol binding protein-like 7                                                                                  |
| 55917         | CTTNBP2NL     | CTTNBP2 N-terminal like<br>transcriptional adaptor 2 (ADA2 homolog) protein-coding                                |
| 93624         | MGC21874      |                                                                                                                   |
| 53615         | MBD3          | methyl-CpG binding domain protein 3                                                                               |
| 3394          | IRF8          | interferon regulatory factor 8                                                                                    |
| 57605         | PITPNM2       | phosphatidylinositol transfer protein, protein-coding                                                             |
| 55612         | C20orf42      | chromosome 20 open reading frame 42                                                                               |
| 10539         | TXNL2         | thioredoxin-like 2                                                                                                |
| 23203         | PMPCA         | peptidase (mitochondrial processing) alpha                                                                        |
| 23034         | SAMD4A        | sterile alpha motif domain containing 4A                                                                          |
| 26301         | GBGT1         | globoside alpha-1, protein-coding                                                                                 |
| 54838         | C10orf26      | chromosome 10 open reading frame 26                                                                               |
| 6122          | RPL3          | ribosomal protein L3                                                                                              |
| 23085         | ERC1          | ELKS/RAB6-interacting/CAST family member 1                                                                        |
| 7840          | ALMS1         | Alstrom syndrome 1                                                                                                |
| 2219          | FCN1          | ficolin (collagen/fibrinogen domain containing) 1                                                                 |
| 5184          | PEPD          | peptidase D                                                                                                       |
| 9580          | SOX13         | SRY (sex determining region Y)-box 13<br>solute carrier family 6 (proline IMINO transporter),<br>protein-coding   |
| 54716         | SLC6A20       |                                                                                                                   |
| 10131         | TRAP1         | TNF receptor-associated protein 1                                                                                 |
| 23277         | KIAA0664      | KIAA0664                                                                                                          |
| 9985          | REC8L1        | REC8-like 1 (yeast)                                                                                               |
| 9404          | LPXN          | leupaxin                                                                                                          |
| 8676          | STX11         | syntaxin 11                                                                                                       |
| 27340         | UTP20         | UTP20, homolog (yeast), protein-coding                                                                            |
| 60625         | DHX35         | DEAH (Asp-Glu-Ala-His) box polypeptide 35                                                                         |
| 57575         | PCDH10        | protocadherin 10                                                                                                  |
| 2057          | EPOR          | erythropoietin receptor                                                                                           |
| 160760        | PPTC7         | PTC7 protein phosphatase homolog ( <i>S. cerevisiae</i> )                                                         |
| 8318          | CDC45L        | CDC45 cell division cycle 45-like ( <i>S. cerevisiae</i> )                                                        |
| 123           | ADFP          | adipose differentiation-related protein                                                                           |
| 57464         | FAM40B        | family with sequence similarity 40, protein-coding                                                                |
| 54825         | PCLKC         | protocadherin LKC                                                                                                 |
| 4054          | LTBP3         | latent transforming growth factor beta binding protein 3                                                          |
| 10755         | GIPC1         | GIPC PDZ domain containing family, protein-coding<br>polymerase (DNA-directed), accessory subunit, protein-coding |
| 10714         | POLD3         |                                                                                                                   |

|        |          |                                                                                                                    |
|--------|----------|--------------------------------------------------------------------------------------------------------------------|
| 1300   | COL10A1  | collagen, type X, alpha 1(Schmid metaphyseal chondrodysplasia)                                                     |
| 10464  | C13orf24 | chromosome 13 open reading frame 24                                                                                |
| 79758  | DHRS12   | dehydrogenase/reductase (SDR family) member 12                                                                     |
| 9840   | KIAA0748 | KIAA0748                                                                                                           |
| 8895   | CPNE3    | copine III                                                                                                         |
| 25875  | LETMD1   | LETM1 domain containing 1<br>solute carrier family 9 (sodium/hydrogen exchanger),protein-coding                    |
| 6553   | SLC9A5   | RGM domain family, protein-coding                                                                                  |
| 285704 | RGMB     | mitochondrial ribosomal protein S17                                                                                |
| 51373  | MRPS17   | EPH receptor A1                                                                                                    |
| 2041   | EPHA1    | INO80 complex homolog 1 (S. cerevisiae)                                                                            |
| 54617  | INOC1    | CLIP-170-related protein                                                                                           |
| 25999  | CLIPR-59 | TEA domain family member 2                                                                                         |
| 8463   | TEAD2    | dedicator of cytokinesis 4                                                                                         |
| 9732   | DOCK4    | transducin (beta)-like 3                                                                                           |
| 10607  | TBL3     | far upstream element (FUSE) binding protein 3                                                                      |
| 8939   | FUBP3    | aarF domain containing kinase 5                                                                                    |
| 203054 | ADCK5    | KIAA1211 protein                                                                                                   |
| 57482  | KIAA1211 | putative homeodomain transcription factor 1                                                                        |
| 10745  | PHTF1    | Yip1 domain family, protein-coding                                                                                 |
| 81555  | YIPF5    |                                                                                                                    |
| 3632   | INPP5A   | inositol polyphosphate-5-phosphatase, protein-coding                                                               |
| 58533  | SNX6     | sorting nexin 6                                                                                                    |
| 80271  | ITPKC    | inositol 1, 5-trisphosphate 3-kinase C, protein-coding<br>microtubule-associated protein, member 2, protein-coding |
| 10982  | MAPRE2   | SHC (Src homology 2 domain containing) transforming protein 1                                                      |
| 6464   | SHC1     | chromosome 1 open reading frame 21                                                                                 |
| 81563  | C1orf21  | small nuclear ribonucleoprotein 70kDa polypeptide (RNP antigen)                                                    |
| 6625   | SNRP70   | adenylate cyclase 2 (brain)                                                                                        |
| 108    | ADCY2    | DEAD (Asp-Glu-Ala-Asp) box polypeptide 50                                                                          |
| 79009  | DDX50    | chromosome 13 open reading frame 23                                                                                |
| 80209  | C13orf23 | neural precursor cell expressed, protein-coding                                                                    |
| 4739   | NEDD9    | HECT domain containing 1                                                                                           |
| 25831  | HECTD1   | leucine-rich repeats and calponin homology (CH) domain containing 2                                                |
| 57631  | LRCH2    | mediator of RNA polymerase II transcription, S. cerevisiae, protein-coding                                         |
| 84246  | MED10    | Rab9 effector protein with kelch motifs                                                                            |
| 10244  | RABEPK   | hexokinase 3 (white cell)                                                                                          |
| 3101   | HK3      | golgi SNAP receptor complex member 2                                                                               |
| 9570   | GOSR2    | LSM4 homolog, U6 small nuclear RNA associated (S. cerevisiae)                                                      |
| 25804  | LSM4     | UDP-Gal:betaGlcNAc beta 1,4- galactosyltransferase, polypeptide 5                                                  |
| 9334   | B4GALT5  | phospholipase A2, group V                                                                                          |
| 5322   | PLA2G5   | beta-transducin repeat containing                                                                                  |
| 8945   | BTRC     |                                                                                                                    |

|       |          |                                     |
|-------|----------|-------------------------------------|
| 22898 | DENND3   | KIAA0870 protein                    |
| 563   | AZGP1    | AZGP1- alpha-2-glycoprotein 1       |
| 6117  | RPA1     | replication protein A1, 70kDa       |
| 5865  | RAB3B    | RAB3B, member RAS oncogene family   |
| 55731 | C17orf63 | chromosome 17 open reading frame 63 |
