# Supplementary material for: Evidence that molecular changes in cells occur before morphological alterations during the progression of breast ductal carcinoma
Source: PubMed Central journal article supplement (PMC2614523; doi:10.1186/bcr2157), 2008-10-17
Supplement: bcr2157-S5.pdf [file bcr2157-S5.pdf]

| <b>Additional Data File 5</b> |                |                                                                       |                                                                                                                                                                                                                                |
|-------------------------------|----------------|-----------------------------------------------------------------------|--------------------------------------------------------------------------------------------------------------------------------------------------------------------------------------------------------------------------------|
| <b>Gene Symbol</b>            | <b>Gene ID</b> | <b><i>In situ</i> component of DCIS-IDC x pure DCIS (Fold Change)</b> | <b>Functional Process</b>                                                                                                                                                                                                      |
| ADFP                          | 123            | -2.79                                                                 | unknown                                                                                                                                                                                                                        |
| ALMS1                         | 7840           | -3.8                                                                  | visual perception, sensory perception of sound, response to stimulus                                                                                                                                                           |
| ANAPC13                       | 25847          | -2.19                                                                 | cell division, ubiquitin cycle, cell cycle, mitosis,                                                                                                                                                                           |
| ANKRD6                        | 22881          | -2.01                                                                 | unknown                                                                                                                                                                                                                        |
| ARFIP1                        | 27236          | -2.55                                                                 | regulation of protein secretion, intracellular protein transport, biological_process                                                                                                                                           |
| ARHGAP19                      | 84986          | -2.2                                                                  | signal transduction                                                                                                                                                                                                            |
| ARHGAP9                       | 64333          | -2.92                                                                 | signal transduction                                                                                                                                                                                                            |
| ATF2                          | 1386           | -2.07                                                                 | transcription, regulation of transcription, DNA-dependent,                                                                                                                                                                     |
| BCHE                          | 590            | -2.62                                                                 | cocaine metabolic process                                                                                                                                                                                                      |
| BIN2                          | 51411          | -2.08                                                                 | unknown                                                                                                                                                                                                                        |
| BOP1                          | 23246          | -2.1                                                                  | rRNA processing                                                                                                                                                                                                                |
| C10orf26                      | 54838          | -4.06                                                                 | unknown                                                                                                                                                                                                                        |
| C13orf23                      | 80209          | 2.41                                                                  | unknown                                                                                                                                                                                                                        |
| C13orf24                      | 10464          | -2.49                                                                 | unknown                                                                                                                                                                                                                        |
| C16orf5                       | 29965          | -5.45                                                                 | apoptotic program, tumor necrosis factor-mediated signaling pathway, biological_process, induction of apoptosis, DNA damage response, signal transduction by p53 class mediator resulting in induction of apoptosis            |
| C1orf66                       | 51093          | -5.32                                                                 | unknown                                                                                                                                                                                                                        |
| C20orf23                      | 55614          | -3.6                                                                  | microtubule-based movement, cell communication,                                                                                                                                                                                |
| C20orf42                      | 55612          | -4.26                                                                 | cell adhesion                                                                                                                                                                                                                  |
| C3AR1                         | 719            | -3.04                                                                 | inflammatory response, G-protein coupled receptor protein signaling pathway, elevation of cytosolic calcium ion concentration, cell motility, signal transduction, chemotaxis, smooth muscle contraction, blood circulation, , |
| C7orf24                       | 79017          | 2.12                                                                  | unknown                                                                                                                                                                                                                        |
| CA3                           | 761            | -2.18                                                                 | one-carbon compound metabolic process                                                                                                                                                                                          |
| CAMP                          | 820            | -2.84                                                                 | defense response to bacterium                                                                                                                                                                                                  |
| CAV1                          | 857            | -2.08                                                                 | cholesterol transport, vesicle organization and biogenesis, cholesterol homeostasis, regulation of blood coagulation,                                                                                                          |
| CCT5                          | 22948          | 2.4                                                                   | protein folding                                                                                                                                                                                                                |
| CDC45L                        | 8318           | -2.9                                                                  | DNA replication initiation, DNA replication, cell cycle, DNA replication checkpoint,                                                                                                                                           |

|           |       |       |                                                                                                                                                                                                                    |
|-----------|-------|-------|--------------------------------------------------------------------------------------------------------------------------------------------------------------------------------------------------------------------|
| CHRN1     | 1140  | -5.11 | regulation of membrane potential, synaptic transmission, cholinergic, signal transduction, muscle contraction, cation transport                                                                                    |
| CHST10    | 9486  | -5.07 | carbohydrate metabolic process, cell adhesion,                                                                                                                                                                     |
| CIRBP     | 1153  | -2.04 | response to cold                                                                                                                                                                                                   |
| CLINT1    | 9685  | -2.5  | endocytosis                                                                                                                                                                                                        |
| CLTCL1    | 8218  | -2.07 | protein complex assembly, anatomical structure morphogenesis, receptor-mediated endocytosis, intracellular protein transport, vesicle-mediated transport                                                           |
| COL17A1   | 1308  | -2.52 | cell-matrix adhesion, phosphate transport, epidermis development                                                                                                                                                   |
| CPNE3     | 8895  | -2.38 | lipid metabolic process, vesicle-mediated transport,                                                                                                                                                               |
| CPT1A     | 1374  | -2.06 | glucose metabolic process, lipid metabolic process, eating behavior, transport, regulation of insulin secretion, fatty acid beta-oxidation, fatty acid metabolic process                                           |
| CTSZ      | 1522  | -2.21 | proteolysis                                                                                                                                                                                                        |
| CTTNBP2NL | 55917 | -4.84 | unknown                                                                                                                                                                                                            |
| CXCL9     | 4283  | 2.7   | inflammatory response, G-protein coupled receptor protein signaling pathway, immune response, signal transduction, chemotaxis, cell-cell signaling, cellular defense response                                      |
| DHRS12    | 79758 | -2.45 | metabolic process                                                                                                                                                                                                  |
| DHX35     | 60625 | -3.07 | RNA splicing, mRNA processing,                                                                                                                                                                                     |
| EPOR      | 2057  | -2.99 | elevation of cytosolic calcium ion concentration, heart development, brain development, signal transduction, small GTPase mediated signal transduction                                                             |
| ERC1      | 23085 | -3.86 | protein transport, positive regulation of anti-apoptosis, activation of NF-kappaB transcription factor, multicellular organismal development, I-kappaB phosphorylation, regulation of transcription, DNA-dependent |
| ETNK2     | 55224 | -2.23 | biological_process, mesodermal cell fate specification, metabolic process, multicellular organismal development, transcription, regulation of transcription, DNA-dependent                                         |
| EYA2      | 2139  | -2.08 | multicellular organismal development                                                                                                                                                                               |
| FAM40B    | 57464 | -2.77 | unknown                                                                                                                                                                                                            |
| FCGR2B    | 2213  | -3.39 | immune response, signal transduction,                                                                                                                                                                              |
| FCGR3A    | 2214  | -2.7  | immune response                                                                                                                                                                                                    |
| FCN1      | 2219  | -3.79 | opsonization, phosphate transport, signal transduction                                                                                                                                                             |
| FN3K      | 64122 | -6.3  | fructoselysine metabolic process                                                                                                                                                                                   |
| GBGT1     | 26301 | -4.06 | glycolipid biosynthetic process, carbohydrate metabolic process,                                                                                                                                                   |

|          |        |       |                                                                                                                                                                                                                                 |
|----------|--------|-------|---------------------------------------------------------------------------------------------------------------------------------------------------------------------------------------------------------------------------------|
| GIPC1    | 10755  | -2.74 | G-protein coupled receptor protein signaling pathway                                                                                                                                                                            |
| GPR98    | 84059  | -2.21 | neuropeptide signaling pathway, photoreceptor cell maintenance, cell-cell adhesion, sensory perception of sound, signal transduction, neurological system process, nervous system development, maintenance of organ identity, , |
| HN1      | 51155  | 2.3   | unknown                                                                                                                                                                                                                         |
| IFT57    | 55081  | -3.3  | regulation of apoptosis, caspase activation, transcription, regulation of transcription, DNA-dependent,                                                                                                                         |
| IMMT     | 10989  | -2.92 | biological_process                                                                                                                                                                                                              |
| INOC1    | 54617  | -2.11 | chromatin remodeling                                                                                                                                                                                                            |
| IRF8     | 3394   | -4.33 | immune response, myeloid cell differentiation, negative regulation of transcription from RNA polymerase II promoter, transcription, regulation of transcription, DNA-dependent                                                  |
| ITGB2    | 3689   | -3.27 | neutrophil chemotaxis, inflammatory response, apoptosis, cell-matrix adhesion, leukocyte adhesion, cell-cell signaling, cell adhesion, regulation of peptidyl-tyrosine phosphorylation, ,                                       |
| ITPKC    | 80271  | -3.26 | unknown                                                                                                                                                                                                                         |
| KBTBD10  | 10324  | -2.42 | ubiquitin cycle, striated muscle contraction,                                                                                                                                                                                   |
| KDR      | 3791   | -2.55 | transmembrane receptor protein tyrosine kinase signaling pathway, protein amino acid phosphorylation, cell differentiation, angiogenesis, multicellular organismal development                                                  |
| KIAA0664 | 23277  | -3.45 | translation                                                                                                                                                                                                                     |
| KIAA0748 | 9840   | -2.38 | unknown                                                                                                                                                                                                                         |
| KIAA1211 | 57482  | 2.3   | unknown                                                                                                                                                                                                                         |
| KIF1A    | 547    | -2.71 | anterograde axon cargo transport, microtubule-based movement,                                                                                                                                                                   |
| LETMD1   | 25875  | -2.32 | unknown                                                                                                                                                                                                                         |
| LPXN     | 9404   | -3.2  | protein complex assembly, signal transduction, cell adhesion                                                                                                                                                                    |
| LRCH2    | 57631  | -2.33 | unknown                                                                                                                                                                                                                         |
| LTBP3    | 4054   | -2.74 | unknown                                                                                                                                                                                                                         |
| MAPRE2   | 10982  | -2.62 | cell division, signal transduction, cell cycle, cell proliferation, cellular defense response, mitosis                                                                                                                          |
| MARCH8   | 220972 | 2.45  | immune response, ubiquitin cycle,                                                                                                                                                                                               |
| MARK3    | 4140   | -4.91 | protein amino acid phosphorylation                                                                                                                                                                                              |
| MBD3     | 53615  | -4.58 | transcription, regulation of transcription, DNA-dependent,                                                                                                                                                                      |
| MED10    | 84246  | 2.15  | transcription, regulation of transcription, DNA-dependent,                                                                                                                                                                      |
| MGC21874 | 93624  | -4.7  | transcription, regulation of transcription, DNA-dependent,                                                                                                                                                                      |
| MRPS17   | 51373  | -2.23 | transport, translation,                                                                                                                                                                                                         |
| NCDN     | 23154  | -5.19 | unknown                                                                                                                                                                                                                         |

|         |        |       |                                                                                                                                                                                                           |
|---------|--------|-------|-----------------------------------------------------------------------------------------------------------------------------------------------------------------------------------------------------------|
| NCOA4   | 8031   | 2.34  | androgen receptor signaling pathway, transmembrane receptor protein tyrosine kinase signaling pathway, positive regulation of transcription, DNA-dependent, male gonad development, transcription         |
| NEDD9   | 4739   | -6.02 | cell division, regulation of cell growth, actin filament bundle formation, signal transduction, cell cycle, cell adhesion, integrin-mediated signaling pathway, cytoskeleton organization and biogenesis, |
| NGDN    | 25983  | -2.59 | rRNA processing, regulation of translation,                                                                                                                                                               |
| NMU     | 10874  | 4.12  | NMU, neuropeptide signaling pathway, regulation of smooth muscle contraction, digestion, signal transduction,                                                                                             |
| NOX4    | 50507  | 2.35  | inflammatory response, cell morphogenesis, cell aging, oxygen and reactive oxygen species metabolic process, superoxide release, negative regulation of cell proliferation                                |
| NUP50   | 10762  | -2.5  | protein transport, intracellular transport, mRNA transport, intracellular protein transport across a membrane,                                                                                            |
| OSBPL7  | 114881 | -4.91 | steroid metabolic process, lipid transport,                                                                                                                                                               |
| P4HA1   | 5033   | 2.2   | protein metabolic process                                                                                                                                                                                 |
| P4HB    | 5034   | -3.01 | peptidyl-proline hydroxylation to 4-hydroxy-L-proline, cell redox homeostasis,                                                                                                                            |
| PCDH10  | 57575  | -3.01 | homophilic cell adhesion, cell adhesion,                                                                                                                                                                  |
| PCLKC   | 54825  | -2.75 | homophilic cell adhesion, cell adhesion, negative regulation of cell growth                                                                                                                               |
| PEPD    | 5184   | -3.65 | collagen catabolic process, proteolysis, amino acid metabolic process                                                                                                                                     |
| PHTF1   | 10745  | 2.42  | transcription, regulation of transcription, DNA-dependent,                                                                                                                                                |
| PIAS2   | 9063   | -2.43 | androgen receptor signaling pathway, ubiquitin cycle, positive regulation of transcription, DNA-dependent, transcription,                                                                                 |
| PITPNM2 | 57605  | -4.28 | metabolic process, transport,                                                                                                                                                                             |
| PLEKHC1 | 10979  | -2.05 | actin cytoskeleton organization and biogenesis, cell adhesion, regulation of cell shape                                                                                                                   |
| PMPCA   | 23203  | -4.2  | proteolysis                                                                                                                                                                                               |
| POLD3   | 10714  | -2.69 | mismatch repair, DNA synthesis during DNA repair,                                                                                                                                                         |
| POMGNT1 | 55624  | -2.25 | protein amino acid O-linked glycosylation, protein amino acid N-linked glycosylation,                                                                                                                     |

|          |        |       |                                                                                                                                                                                                                                                                                 |
|----------|--------|-------|---------------------------------------------------------------------------------------------------------------------------------------------------------------------------------------------------------------------------------------------------------------------------------|
| PPM1H    | 57460  | -2.02 | unknown                                                                                                                                                                                                                                                                         |
| PPP2R3A  | 5523   | -2.48 | protein amino acid dephosphorylation                                                                                                                                                                                                                                            |
| PPTC7    | 160760 | -2.92 | unknown                                                                                                                                                                                                                                                                         |
| PTBP2    | 58155  | 2.84  | RNA splicing, mRNA processing,                                                                                                                                                                                                                                                  |
| RAD51AP1 | 10635  | 2.96  | DNA repair, double-strand break repair via homologous recombination,                                                                                                                                                                                                            |
| RARRES3  | 5920   | -3.64 | negative regulation of cell proliferation                                                                                                                                                                                                                                       |
| REC8L1   | ND     | -3.37 | meiotic recombination, meiosis, spermatogenesis, sister chromatid cohesion,                                                                                                                                                                                                     |
| RGMB     | 285704 | -2.28 | positive regulation of transcription, signal transduction, BMP signaling pathway, cell adhesion,                                                                                                                                                                                |
| RNF43    | 54894  | -2.23 | unknown                                                                                                                                                                                                                                                                         |
| RPL3     | 6122   | -4.02 | translation                                                                                                                                                                                                                                                                     |
| RPL41    | 6171   | -3.52 | translation                                                                                                                                                                                                                                                                     |
| RSL1D1   | 26156  | -2    | translation                                                                                                                                                                                                                                                                     |
| RUNDC1   | 146923 | 2.76  | unknown                                                                                                                                                                                                                                                                         |
| SAMD4A   | 23034  | -4.11 | positive regulation of translation                                                                                                                                                                                                                                              |
| SHC1     | 6464   | -2.54 | positive regulation of cell proliferation, regulation of cell growth, regulation of epidermal growth factor receptor activity, intracellular signaling cascade, epidermal growth factor receptor signaling pathway, activation of MAPK activity, positive regulation of mitosis |
| SKIL     | 6498   | 2.34  | signal transduction, transcription from RNA polymerase II promoter, multicellular organismal development                                                                                                                                                                        |
| SLC6A20  | 54716  | -3.54 | neurotransmitter transport                                                                                                                                                                                                                                                      |
| SLC9A5   | 6553   | -2.32 | sodium ion transport, ion transport, regulation of pH                                                                                                                                                                                                                           |
| SMARCA3  | ND     | -2.84 | regulation of transcription from RNA polymerase II promoter, chromatin modification, transcription                                                                                                                                                                              |
| SOX13    | 9580   | -3.58 | anatomical structure morphogenesis, regulation of transcription, DNA-dependent,                                                                                                                                                                                                 |
| SPOCK2   | 9806   | -2.24 | extracellular matrix organization and biogenesis, synaptogenesis, regulation of cell differentiation                                                                                                                                                                            |
| STK25    | 10494  | -2    | signal transduction, response to oxidative stress, protein amino acid phosphorylation                                                                                                                                                                                           |
| STX11    | 8676   | -3.18 | intracellular protein transport, membrane fusion, vesicle-mediated transport                                                                                                                                                                                                    |
| SULF1    | 23213  | 3.92  | apoptosis, metabolic process, heparan sulfate proteoglycan metabolic process                                                                                                                                                                                                    |
| SV2B     | 9899   | -2.21 | neurotransmitter transport                                                                                                                                                                                                                                                      |
| SYN1     | 6853   | -2.97 | synaptic transmission, neurotransmitter secretion,                                                                                                                                                                                                                              |

|         |       |       |                                                                                                                                                                                                  |
|---------|-------|-------|--------------------------------------------------------------------------------------------------------------------------------------------------------------------------------------------------|
| TARDBP  | 23435 | -4.03 | RNA splicing, transcription from RNA polymerase II promoter, mRNA processing, transcription, mitosis, regulation of transcription, DNA-dependent                                                 |
| TBC1D9B | 23061 | -2.14 | regulation of Rab GTPase activity                                                                                                                                                                |
| TRAP1   | 10131 | -3.5  | biological_process, protein folding,                                                                                                                                                             |
| TXNDC11 | 51061 | -6    | cell redox homeostasis                                                                                                                                                                           |
| TXNL2   | 10539 | -4.24 | cell redox homeostasis                                                                                                                                                                           |
| UBXD1   | 80700 | -3.63 | biological_process                                                                                                                                                                               |
| UFD1L   | 7353  | -3.01 | skeletal development, ubiquitin cycle, ubiquitin-dependent protein catabolic process                                                                                                             |
| UTP20   | 27340 | -3.16 | negative regulation of cell proliferation                                                                                                                                                        |
| ZBTB5   | 9925  | -2.82 | transcription, regulation of transcription, DNA-dependent,                                                                                                                                       |
| ZFP36L1 | 677   | -2.4  | mRNA catabolic process, deadenylation-dependent decay, regulation of mRNA stability, vasculogenesis, regulation of translation,                                                                  |
| RABEPK  | 10244 | -4.94 | receptor-mediated endocytosis, vesicle docking during exocytosis,                                                                                                                                |
| RHOU    | 58480 | -3.12 | small GTPase mediated signal transduction                                                                                                                                                        |
| GPR77   | 27202 | -2.52 | G-protein coupled receptor protein signaling pathway, signal transduction, chemotaxis, biological_process,                                                                                       |
| KCTD15  | 79047 | -2.35 | potassium ion transport                                                                                                                                                                          |
| AOF2    | 23028 | -2.46 | transcription, regulation of transcription, DNA-dependent,                                                                                                                                       |
| LSM4    | 25804 | -2.85 | RNA splicing, mRNA processing,                                                                                                                                                                   |
| IGSF6   | 10261 | 2.32  | immune response, cell surface receptor linked signal transduction,                                                                                                                               |
| CORO1C  | 23603 | 3.05  | signal transduction, phagocytosis,                                                                                                                                                               |
| AZGP1   | 563   | -2.94 | immune response, antigen processing and presentation, cell adhesion                                                                                                                              |
| DENND3  | 22898 | -3.51 | unknown                                                                                                                                                                                          |
| DGCR2   | 9993  | -2.96 | cell adhesion, organ morphogenesis,                                                                                                                                                              |
| KPNA6   | 23633 | -2.32 | NLS-bearing substrate import into nucleus, intracellular protein transport,                                                                                                                      |
| B4GALT5 | 9334  | -2.77 | carbohydrate metabolic process                                                                                                                                                                   |
| LOX     | 4015  | 2.01  | transmembrane receptor protein tyrosine kinase signaling pathway, collagen fibril organization, protein modification process, elastic fiber assembly, blood vessel development, lung development |
| VPS54   | 51542 | -2.25 | protein transport, retrograde transport, endosome to Golgi,                                                                                                                                      |
| FGFBP1  | 9982  | -3.28 | signal transduction, negative regulation of cell proliferation, cell-cell signaling                                                                                                              |

|       |      |       |                                                                                                |
|-------|------|-------|------------------------------------------------------------------------------------------------|
| GOSR2 | 9570 | -3.97 | ER to Golgi vesicle-mediated transport,<br>intracellular protein transport, membrane<br>fusion |
|-------|------|-------|------------------------------------------------------------------------------------------------|
